# Supplementary material
Source: publisher figshare collection journal article supplement (https://diabetesjournals.figshare.com/ndownloader/files/22491683)

***Spinetti G. et al.***

**MicroRNA-21/****PDCD4 proapoptotic signaling from circulating CD34+ cells to vascular endothelial cells: a potential contributor to adverse cardiovascular outcomes in patients with critical limb ischemia**

**Supplemental Tables and Figures**


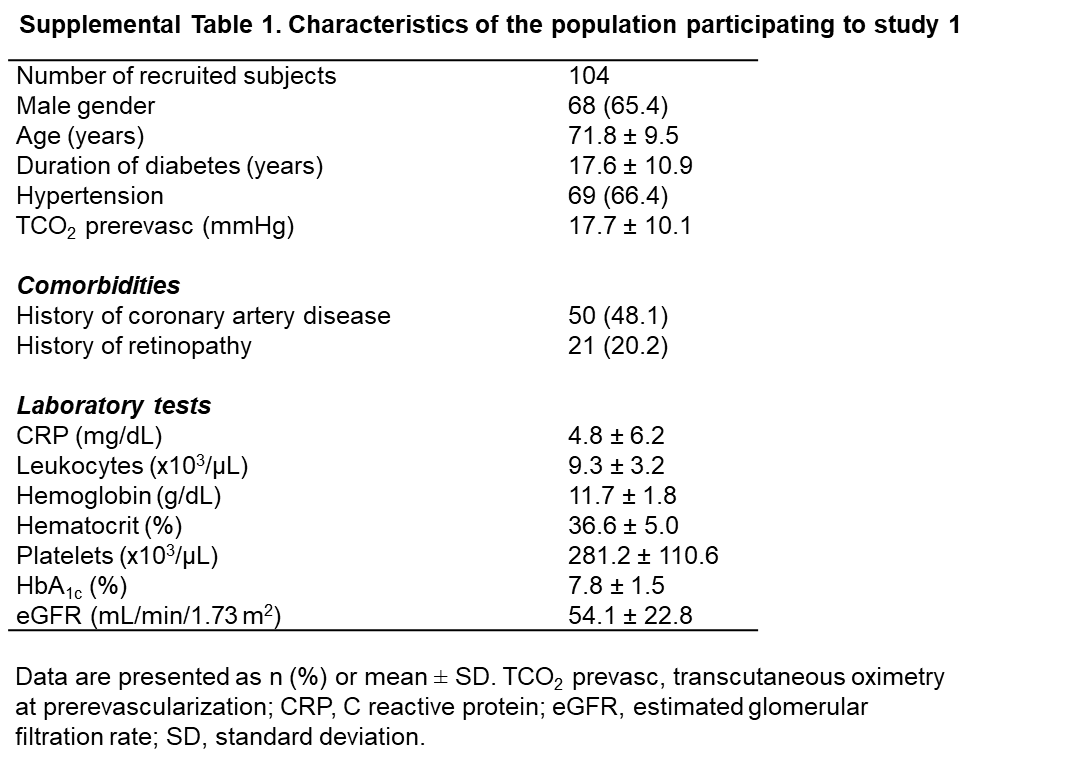


**
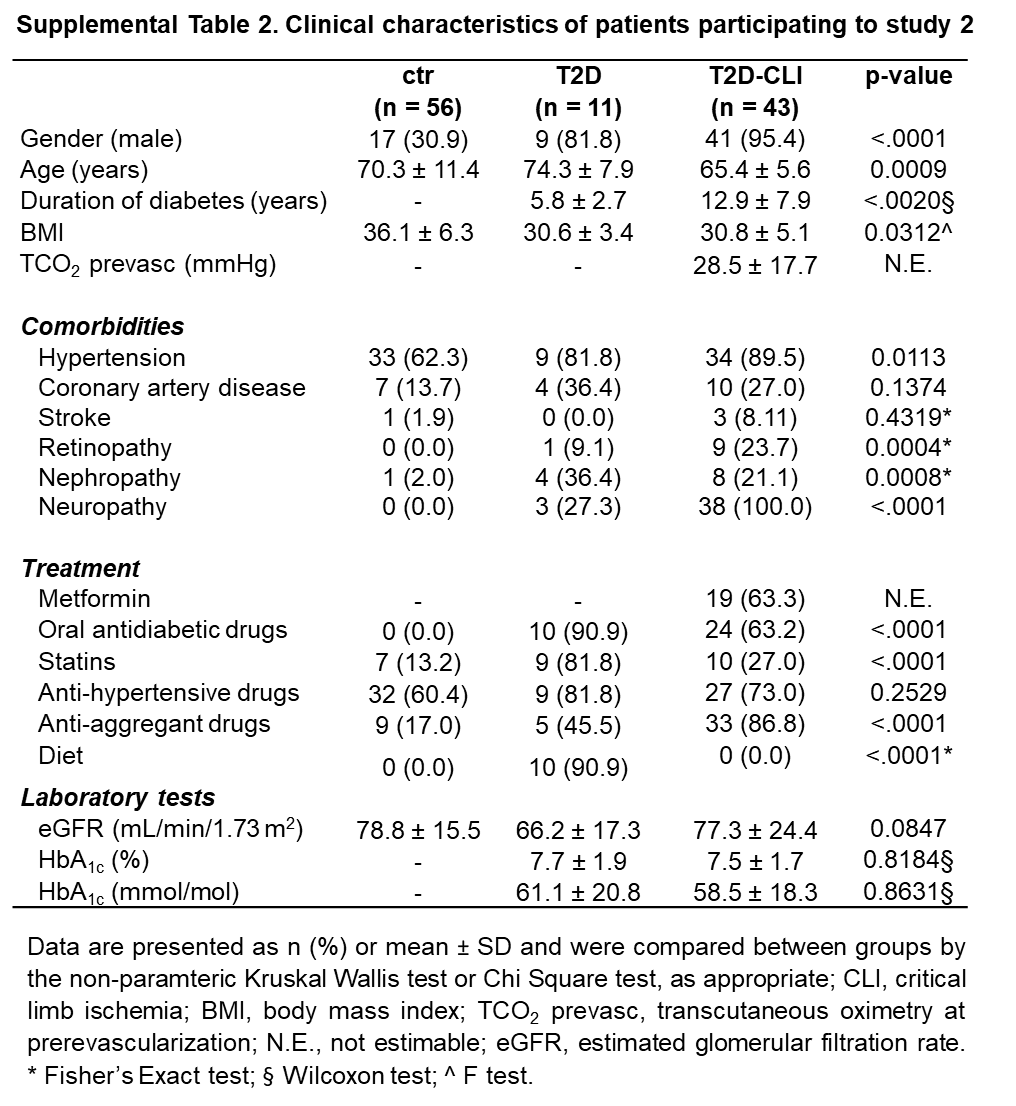
**

**
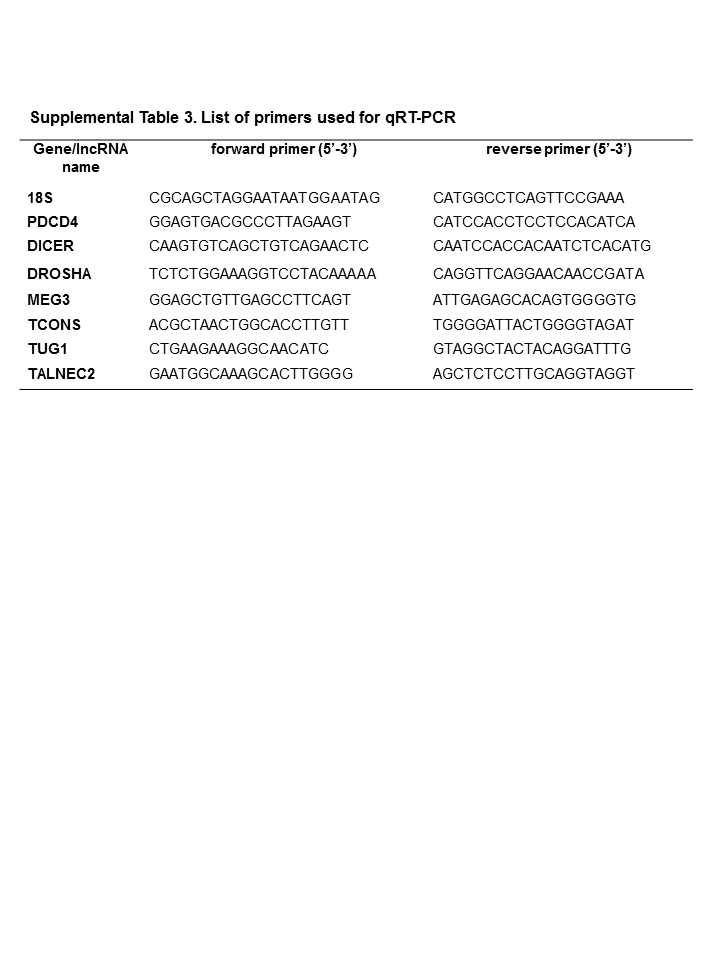
**

**
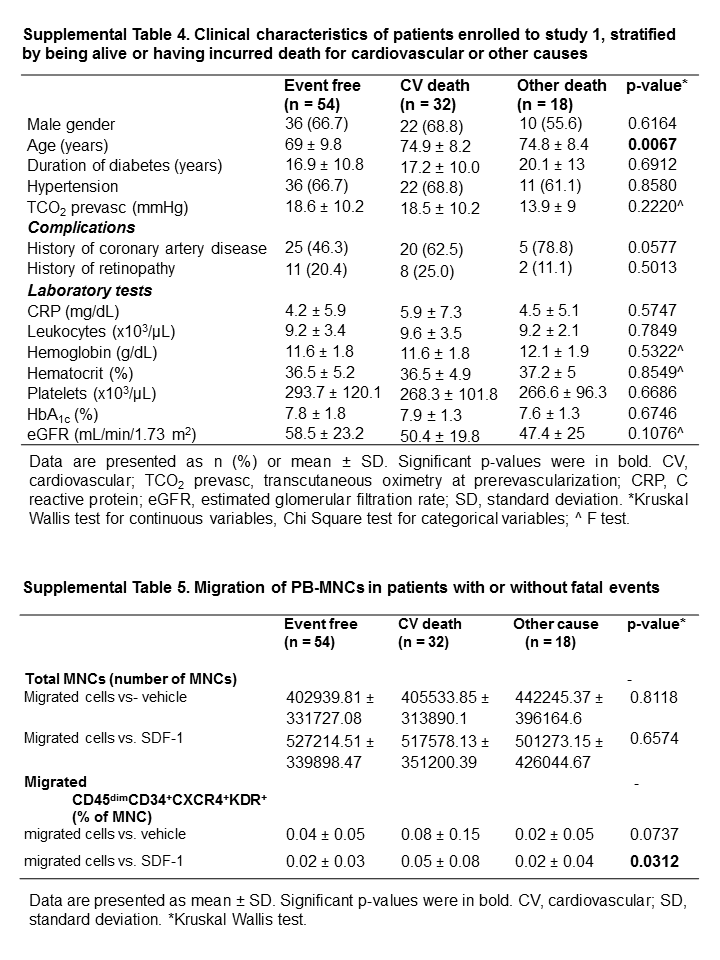
**

**
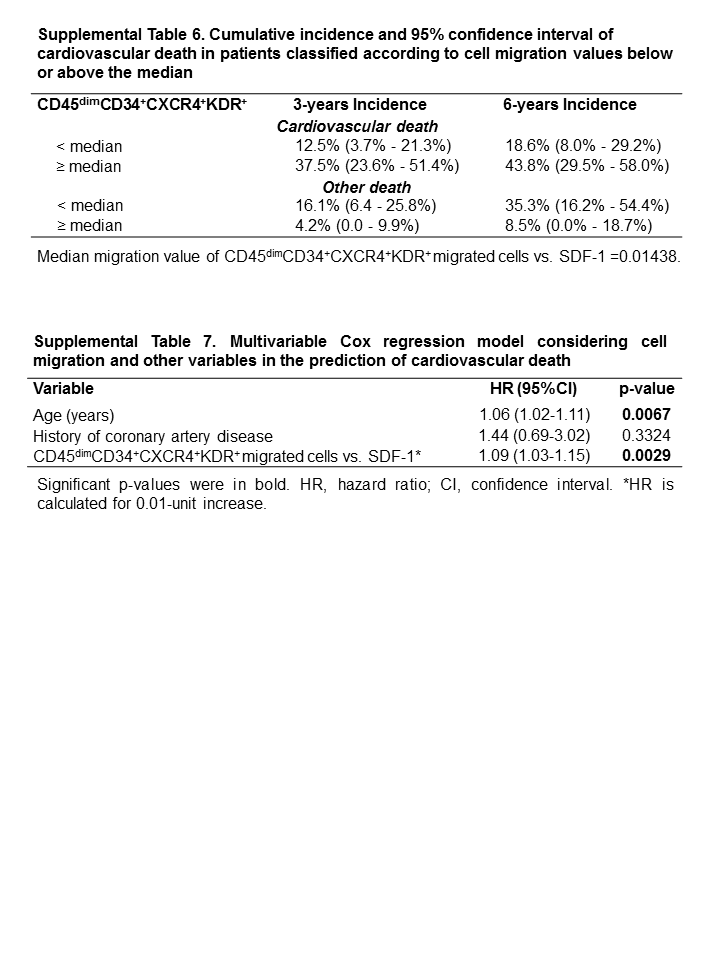
**

**
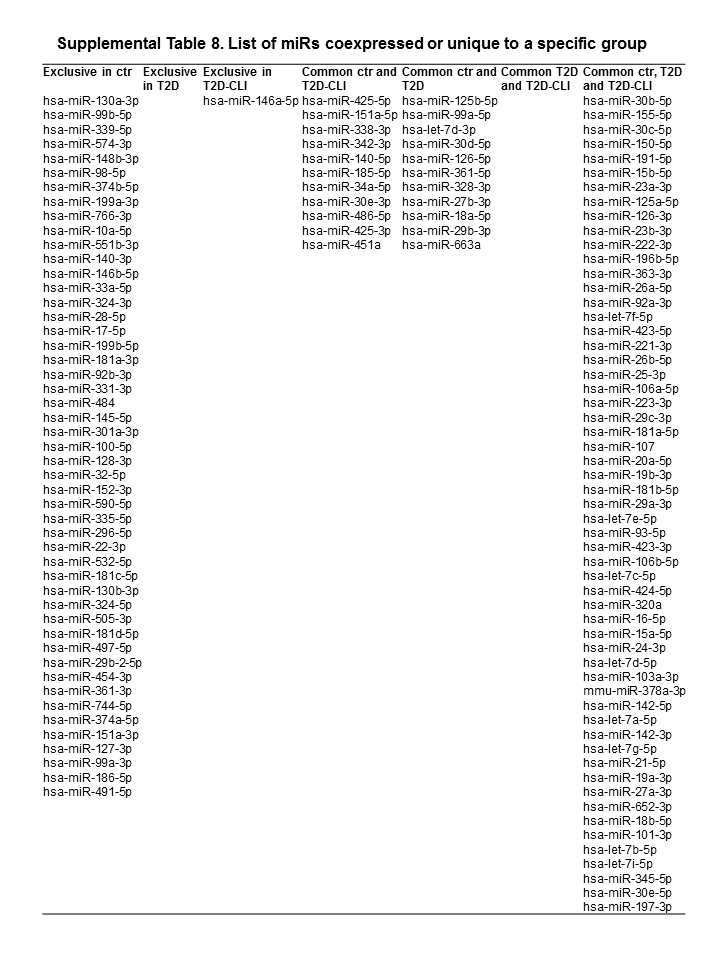
**

**
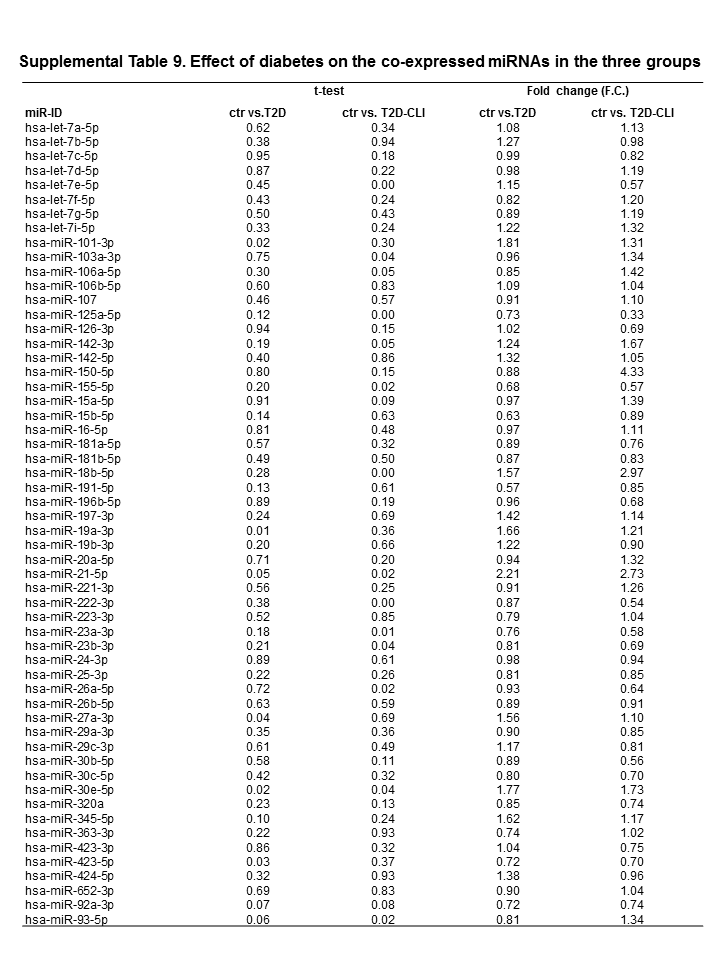
**

**
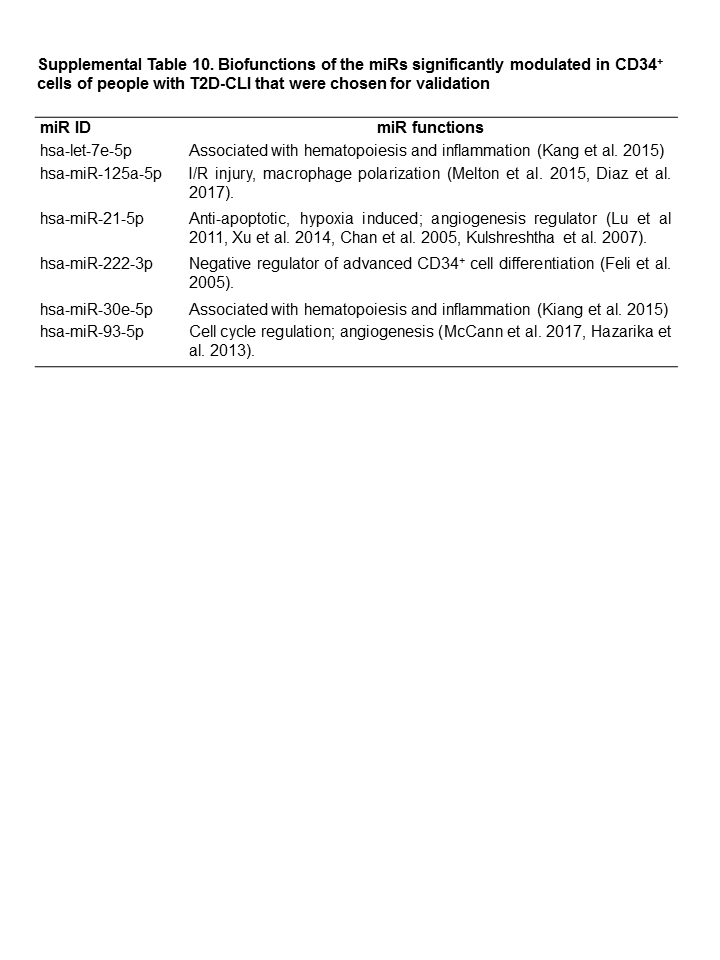
**


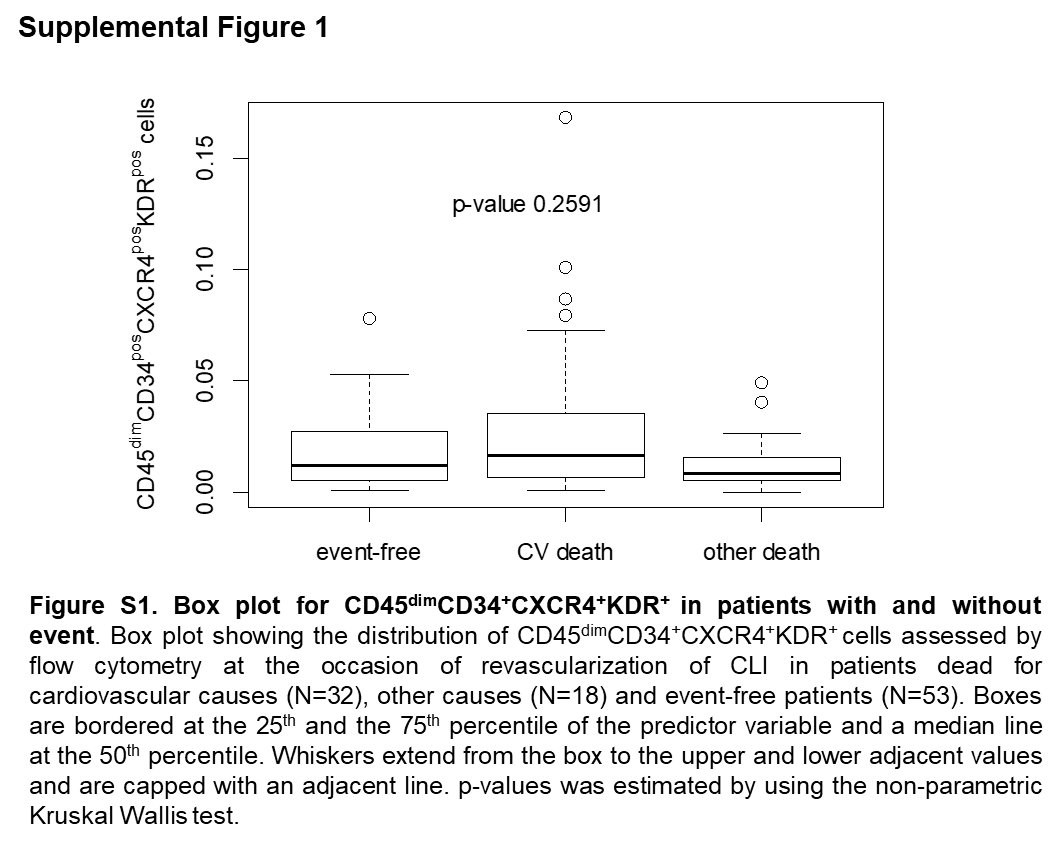


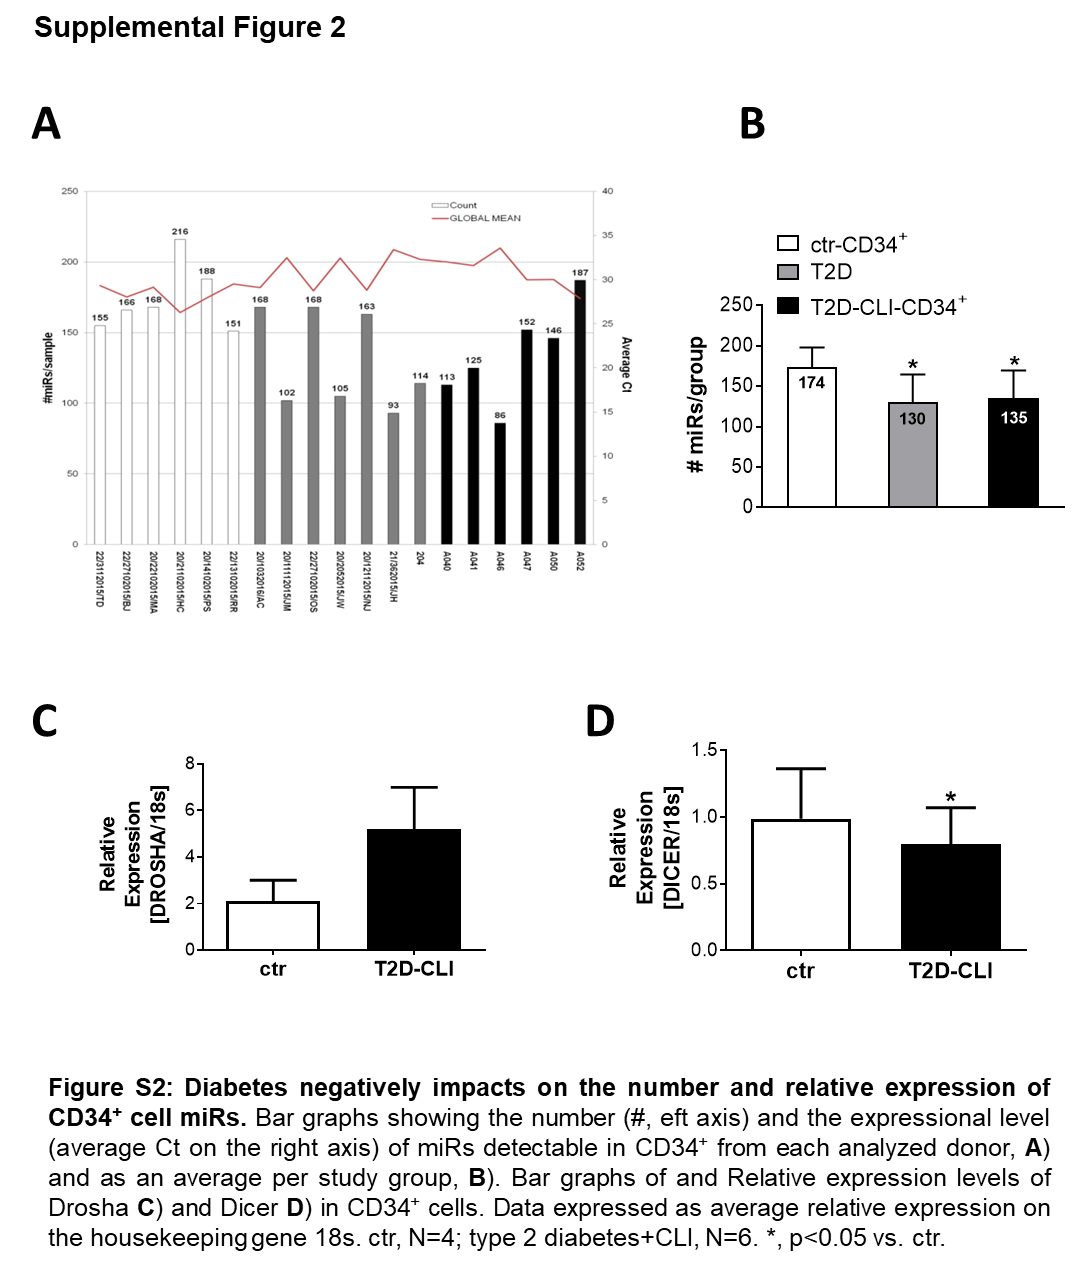


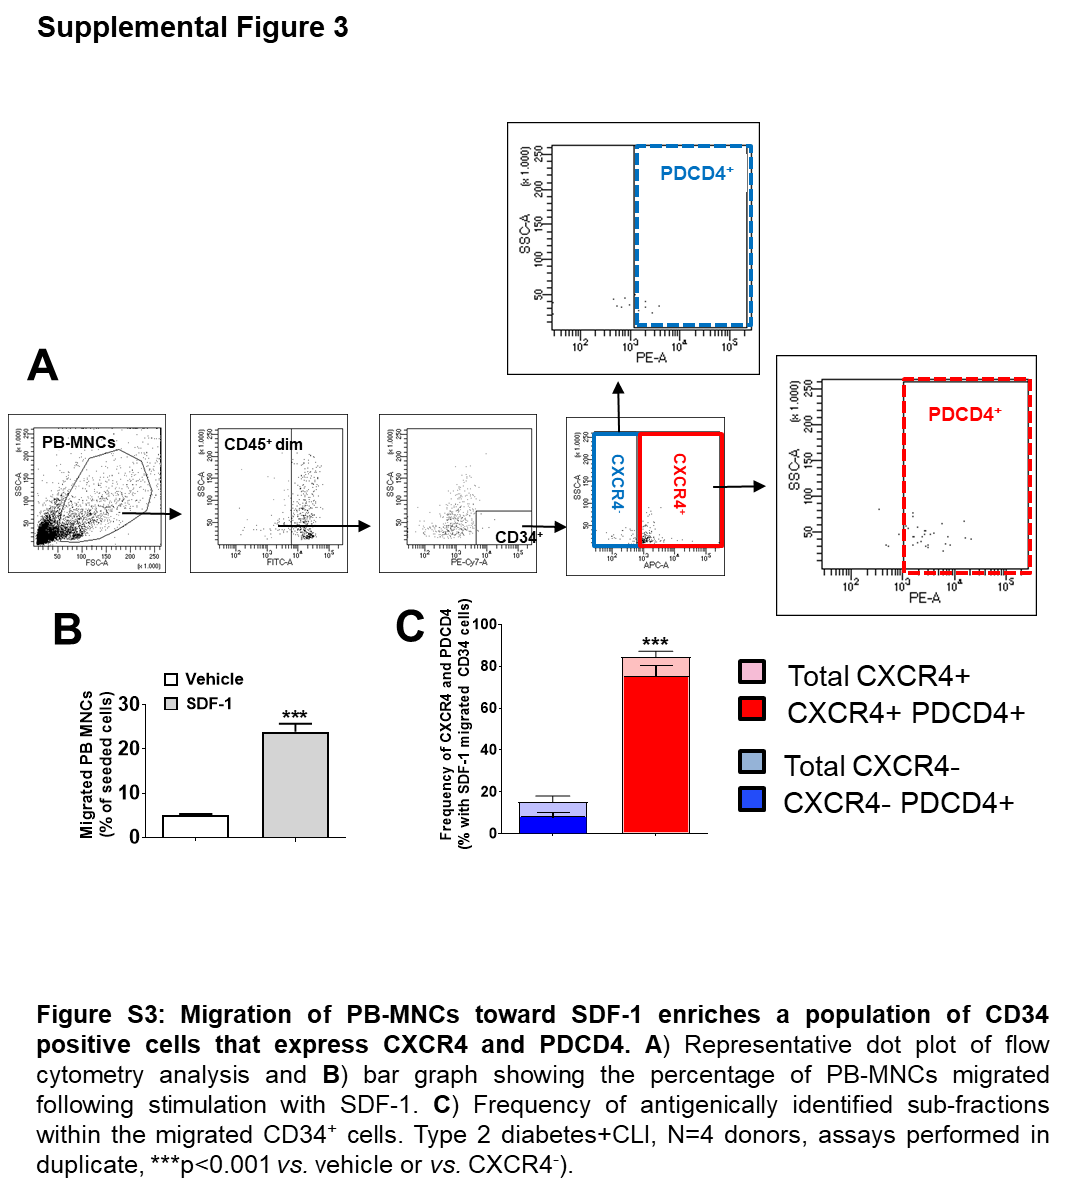

Supplement: Supplementary file 1 [file 22491683]
